# Applications for Deep Learning in Ecology

## 2 Authors

3 Sylvain Christin<sup>1</sup>, Éric Hervet<sup>2</sup>, Nicolas Lecomte<sup>1\*</sup>

4 <sup>1</sup> Canada Research Chair in Polar and Boreal Ecology, Université de Moncton, Moncton, NB, Canada

5 Department of Biology, University of Moncton, Moncton, NB, Canada

6 <sup>2</sup> Department of Computer Science, Université de Moncton, Moncton, NB, Canada

## 7 Abstract

8 A lot of hype has recently been generated around deep learning, a group of artificial intelligence  
9 approaches able to break accuracy records in pattern recognition. Over the course of just a few years,  
10 deep learning revolutionized several research fields such as bioinformatics or medicine. Yet such a  
11 surge of tools and knowledge is still in its infancy in ecology despite the ever-growing size and the  
12 complexity of ecological datasets. Here we performed a literature review of deep learning  
13 implementations in ecology to identify its benefits in most ecological disciplines, even in applied  
14 ecology, up to decision makers and conservationists alike. We also provide guidelines on useful  
15 resources and recommendations for ecologists to start adding deep learning to their toolkit. At a time  
16 when automatic monitoring of populations and ecosystems generates a vast amount of data that cannot  
17 be processed by humans anymore, deep learning could become a necessity in ecology.

## 18 Keywords

19 Deep Learning, Neural Network, Ecology, Automatic Monitoring, Pattern Recognition, Artificial  
20 Intelligence

## 21 Introduction

22 Over the course of just a few years, deep learning, a branch of machine learning, has permeated into  
23 various science disciplines and everyday tasks. This artificial intelligence discipline has become

24 increasingly popular thanks to its high flexibility and performance. For instance, deep learning  
25 algorithms broke accuracy records in image classification<sup>1</sup> or speech recognition<sup>2</sup>. Deep learning is  
26 rapidly expanding, revolutionizing the way we use computer power to automatically detect specific  
27 features in data and to perform tasks such as classification, clustering or creating predictive models<sup>3</sup>.  
28 Applications for these tools now span scientific and technological fields as varied as medicine<sup>4,5</sup>,  
29 bioinformatics<sup>6</sup>, finance<sup>7</sup>, but also automotive engineering (e.g. self-driving cars<sup>8</sup>), robotics<sup>9</sup>, or even  
30 video games<sup>10</sup>. Such a surge of tools and knowledge provided by deep learning could also be valuable  
31 in ecology as well, yet its use is still limited in this field and overview of its potential in ecology is  
32 warranted.

33 Overall, machine learning tools, not just deep learning ones, are interesting for ecologists because they  
34 are able to analyze complex nonlinear data, with interactions and missing data, a type of complexity  
35 frequently encountered in ecology<sup>3,11</sup>. Machine learning has already been successfully applied to  
36 ecology to perform tasks such as acoustic classification<sup>12</sup>, ecological modelling<sup>13</sup> or studying animal  
37 behaviour<sup>14</sup>. What makes deep learning so powerful resides in the way it can learn features from data.  
38 Machines can be taught in two main ways. They can learn without supervision where computers try to  
39 automatically detect patterns and similarities in unlabelled data. With this method, no specific output is  
40 expected and this is often used as an exploratory tool to detect features in data, reduce its number of  
41 dimensions or cluster similar groups<sup>14</sup>. For detection, identification or prediction tasks, learning is  
42 usually done with supervision. A labelled dataset with the objects to recognize is first given to the  
43 computers so they can train to associate the labels to the examples. They can then recognize and  
44 identify these objects in other datasets<sup>15</sup>. However, with conventional machine learning, it is not enough  
45 to just provide labels. The user also needs to specify in the algorithm what to look for<sup>3,15</sup>. For instance,  
46 to detect giraffes in pictures, characteristics of giraffes will need to be programmed for the algorithm to  
47 be able to recognize them. This can hamper non-specialists of machine learning because it usually

48 requires a deep knowledge of the studied system and good programming skills<sup>15</sup>. In contrast, deep  
49 learning methods skip such a step. By using general learning procedures, deep learning algorithms are  
50 able to automatically detect and extract features from data<sup>15</sup>. This means that we only need to tell a  
51 deep learning algorithm whether a giraffe is present in a picture and, given enough examples, it will be  
52 able to figure out by itself what a giraffe looks like. This is made possible by creating a multi-layered  
53 decomposition of the data with different levels of abstraction that allow the algorithm to learn complex  
54 functions representing the data<sup>15</sup>. This ability to auto-detect features in complex, highly dimensional  
55 data, with highly predictive accuracy is what led to the fast expansion and ubiquity of deep learning  
56 methods<sup>15</sup>. And the numerous levels of ecology (from individual to meta-ecosystem scales) should not  
57 be different from the highly dimensional data deep learning is especially accurate and efficient at.

#### 58 **Box 1: Deep neural networks architectures**

59 Considering the complexity of ecological data and the ever-growing size of ecological datasets, a  
60 phenomenon recently amplified by the widespread use of automatic recorders<sup>16,17</sup>, we believe that deep  
61 learning can be a key tool for many ecological analyses. Yet, the mathematical complexity and the  
62 programming skills required to implement such a tool might be intimidating and prevent ecologists to  
63 use it. Besides, to our knowledge, no paper provides an insightful overview on when a deep learning  
64 tool could be useful to ecology. Here we perform a literature review of deep learning implementations  
65 in ecology to identify its benefits in most ecological disciplines, even in applied ecology, up to decision  
66 makers and conservationists alike. We also provide useful insight and resources to help ecologists  
67 decide whether deep learning is an appropriate method of analysis for their studies.

68

#### 69 **Methods**

70 We performed a review of articles that use deep learning methods for ecological studies or that describe  
71 methods that could be used in ecological studies such as animal or plant identification or behavioural  
72 detection.

73 Our literature review was performed on April 4<sup>th</sup> 2018 using four search engines, i.e. *Web of Science*,  
74 *Science Direct*, *arxiv.org* and *bioRxiv*. While some articles that have not yet been reviewed by peers can  
75 be found in the last two databases, we decided to include them (n= 26) because the widespread use of  
76 deep learning is still very recent, the value of their study is clear, and the publishing process can  
77 sometimes be long. Our goal here was not to validate the science behind the studies but to provide  
78 examples and ideas on how to use deep learning in ecology. Doing so allowed us to have the most up-  
79 to-date information about research in progress and/or made public. If a published version of an article  
80 found on a preprint server was available, this version was selected. When available, we restricted our  
81 search to categories relevant to ecology. Otherwise, the keyword “ecology” was added to the search  
82 terms. We performed three searches in each website with the following keywords: 1) “deep learning”  
83 AND algorithm; 2) “convolutional neural network”; 3) “recurrent neural network”. These two types of  
84 deep learning methods were chosen, as they are currently the two most popular methods in deep  
85 learning across disciplines. The list of all returned papers can be found at  
86 <https://figshare.com/s/9810c182268244c5d4b2>.

## Results

87 In total, 74 unique articles were found. We narrowed down our selection of studies by reading all or  
88 parts of each paper found and selected 39 papers that described research related to ecology or that  
89 could be of use for ecologists. Eleven (11) papers were added after searching for articles within the  
90 reference list of the selected papers. Almost two thirds of the selected papers (n = 32, 64 %) were  
91 published in 2017 or 2018 (Figure 1), showing the recent interest in the method. Of all 50 selected

92 papers, 46 implemented at least one deep learning model, with one implementing two – a CNN and a  
93 RNN<sup>18</sup>. The remaining papers only mentioned or discussed the use of deep learning for ecological  
94 studies.

95 **Figure 1: Repartition of deep learning implementations in ecology by year and architecture.**

96 Since deep learning was popularized by the performance of convolutional neural network (CNN) on  
97 image recognition<sup>1</sup>, it is not surprising that CNNs are the dominant implementation in ecology (Figure  
98 1) and that more than half of the studies (n = 25, 54%) exploit deep learning for image processing.  
99 Other uses include sound processing (n = 7, 15%) or modelisation (n = 10, 22%). Architectural  
100 differences between RNN and CNN explain why the former have been used for longer (Box 1).  
101 Deep learning methods have already proven to provide good results in a wide range of applications  
102 (Figure 2). The next sections provide an in-depth review of some areas of ecology that can benefit from  
103 such tools.

104 **Figure 2: Examples of deep learning applications in ecology depending on the study scale**

105 **Identification and classification**

106 With the advent of automatic monitoring, ecologists can now accumulate a large amount of data in a  
107 short amount of time. However, extracting relevant information from the large recorded datasets has  
108 become a bottleneck, as doing it manually is both tedious and time consuming<sup>19,20</sup>. Automating the  
109 analysis process to identify and classify the data has therefore become necessary and deep learning  
110 methods have proven to be an effective solution. In fact, all top methods from the LifeCLEF 2017  
111 contest, an event that aims to evaluate the performance of state-of-the-art identification tools for  
112 biological data, were based on deep learning<sup>21</sup>. CNNs have already successfully been used to identify  
113 plants from images of their leaves<sup>22,23</sup> and digitized images of herbaria<sup>24</sup>. CNNs could thus prove to be

114 useful tools for taxonomists. They have also been used to classify acoustic data such as bird songs<sup>25-27</sup>,  
115 marine mammals vocalizations<sup>28</sup>, and even mosquito sounds<sup>29</sup>.

116 Use of deep learning has also been successfully used in plant phenotyping, i.e. classifying the visible  
117 characteristics of a plant to link them to its genotype. Applications include counting leaves to assess the  
118 growth of the plant<sup>30</sup>, monitoring the root systems of plants to study their development and their  
119 interaction with the soil<sup>31</sup> or counting wheat spikelets<sup>32</sup>. While mainly used in agricultural research so  
120 far, there is no doubt that these techniques could be transposed in ecology, for example to study the  
121 productivity of an ecosystem or to measure the impacts of herbivory on plant communities.

## 122 **Behaviour studies**

123 Deep neural networks could prove to be valuable assets to study the behaviour of animals by providing  
124 a means to automatically describe their activities. Insight on the social behaviour of individuals could  
125 then be gained by describing their body position and tracking their gaze<sup>33,34</sup>. Images from camera  
126 trapping can be used to describe and classify the activities of wild animals such as feeding or resting<sup>20</sup>.  
127 Collective behaviour and social interactions of species such as bees can be studied by using CNNs to  
128 locate and identify marked individuals<sup>35</sup>.

129 As telemetry datasets are growing bigger every day, deep learning can be used to detect activity  
130 patterns such as foraging. Indeed, by training a CNN with GPS localizations coupled with time-depth  
131 recorder data used to detect the diving behaviour of seabirds, a research team has been able to predict  
132 diving activities from GPS data alone<sup>36</sup>.

133 Models of animal behaviour can also be created. By analyzing videos of nematode worms (*C. elegans*),  
134 a recurrent neural network was able to generate realistic simulations of worm behaviours. The model

135 could also be used as a classification tool<sup>37</sup>. RNNs also allowed the theoretical simulation of courtship  
136 rituals in monogamous species<sup>38</sup> and of the evolution of species recognition in sympatric species<sup>39</sup>.

### 137 **Population monitoring**

138 As deep learning can detect, identify and classify individuals in automatic monitoring data, it can also  
139 be used to help monitor populations. For instance, population size can be estimated by counting  
140 individuals<sup>20</sup>, or by using estimation methods such as distance sampling<sup>40</sup>. By extension, information  
141 such as population distribution or density can also be calculated from this data as it has already been  
142 done with traditional methods<sup>16</sup>.

143 Detecting symptoms of diseases is a large potential provided by deep learning. For example, CNNs  
144 already help detect plant diseases in olive trees<sup>41</sup>, cassavas (*Manihot esculenta*)<sup>42</sup> or various crops<sup>43</sup>.  
145 While the primary use has been directed towards agricultural applications, this could also be widely  
146 applied to wild plant and animal populations to help find hints of scars, malnutrition or the presence of  
147 visible diseases like mange<sup>44</sup>.

### 148 **Ecological modelisation**

149 Ecologists often require powerful and accurate predictive models to better understand complex  
150 processes or to provide forecasts in a gradually changing world<sup>3</sup>. Machine learning methods have been  
151 shown to show great promise in that regard<sup>3,11</sup>, and deep learning methods are no exception. A deep  
152 neural network has recently been able to accurately create distribution models of species based on their  
153 ecological interactions with other species<sup>45</sup>. With enough data, methods such as deep Boltzmann  
154 machines could become the avenue for studying ecological interactions<sup>46</sup>.

155 Deep networks have the potential to model the influence of environmental variables on living species  
156 even though they have not yet been applied in this way. Studies in the medical field managed to predict  
157 gastrointestinal morbidity in humans from pollutants in the environment<sup>47,48</sup>, a method that could easily

158 be transferable to wild animals. Recurrent networks have also been shown to successfully predict  
159 abundance and community dynamics based on environmental variables for phytoplankton<sup>49–51</sup> and  
160 benthic communities<sup>52</sup>. Overall, with functionality in predicting species distribution and environmental  
161 predictors, this means that deep learning could be part of the toolbox of ecological niche models.

## 162 **Ecosystem management and conservation**

163 With human activities affecting all ecosystems, a major task for ecologists has been to monitor and  
164 understand these ecosystems and their changes for management and conservation purposes<sup>53</sup>. We argue  
165 here that deep learning tools are appropriate methods to fulfill such aims. For instance, biodiversity in a  
166 given site can be estimated via the identification of species sampled in automatic recordings<sup>54</sup>. Beyond  
167 species identification, the timing of species presence in any given site can also be measured with time  
168 labels tailored to species lifecycles<sup>20</sup>. The functioning and stability of ecosystems can then be  
169 monitored by converting all these species data and interactions into food web models and/or focusing  
170 on indicator species such as bats, which are very sensitive to habitat and climate change<sup>55</sup>.

171 With respect to habitat management, new examples have just been described. By being able to model  
172 the dynamics of phytoplankton and benthic communities from environmental variables, deep networks  
173 provided a tool to monitor and improve water quality management<sup>49,51,52</sup>.

174 Deep learning is also perfect to perform landscape analysis for large scale monitoring. For instance, in  
175 order to monitor coral reefs, CNNs have been trained to quantify the percent cover for key benthic  
176 substrates from high-resolution reef images<sup>56</sup>. Events that modify the landscape such as cotton blooms  
177 are detectable using convolutional networks and aerial images<sup>57</sup>. And by combining satellite imaging,  
178 LIDAR data and a multi-layer neural network, the aboveground carbon density was quantified in order  
179 to define areas of high conservation value in forests on the island of Borneo<sup>58</sup>.



180 Beyond mapping species and areas of high value for ecosystems and conservation, deep learning has a  
181 large set of potential applications to track the impacts of human activities. Recently, deep neural  
182 networks mapped the footprint of fisheries using tracking information from industrial fishing vessels<sup>59</sup>.  
183 And in order to reduce illegal trafficking, it has been suggested to use deep learning algorithms to  
184 monitor such activities on social media to automatically detect pictures of illegal wildlife products<sup>60</sup>.  
185 To go even further, deep learning has already been envisioned as a cornerstone to create fully  
186 automated system designed to create and manage wild ecosystems<sup>61</sup>. Data gathered by automated  
187 sensors would be sent to a deep learning algorithm that could then take decisions such as reseeding by  
188 using drones or eradicating invasive species with robots. Such systems would allow continuous  
189 ecosystem management without requiring any human intervention<sup>61</sup>. While this type of large-scale  
190 automatic systems is seen on the applied perspective, we could suggest a fundamental use aiming at  
191 mapping and studying biodiversity patterns and processes across various ecosystems.

## 192 **Box 2: Deep learning toolkit**

### 193 **Challenges to apply deep learning in ecology**

194 While deep learning methods are powerful and promising for ecologists, it is also important to  
195 remember that these tools also have requirements that need to be considered before deciding to  
196 implement them. Here are some of the major difficulties that can be encountered when dabbling in deep  
197 learning waters.

198 Perhaps the biggest challenge for deep learning lies in the need for a large training dataset to achieve  
199 high accuracy. Algorithms are trained by examples and the machine can only detect what has been  
200 previously shown to her. This implies that training datasets must often need thousands to millions of  
201 examples – depending on the task – with bigger datasets giving better results<sup>62</sup>. This also implies that  
202 the dataset we want to analyze must have a consequent size and that finding the right threshold of size

203 is critical. For instance, in acoustic processing, at least 36 hours of recording are required for a deep  
204 learning algorithm to become more efficient than human listening<sup>25</sup>. Although this is a challenge in its  
205 own, the good news is, it is now relatively easy to gather hours and hours of acoustic recordings<sup>63</sup>.  
206 To help alleviate the need for data-hungry training examples, multiple solutions have appeared in  
207 recent years and are readily available in ecology. A popular choice is transfer learning<sup>64</sup>. Transfer  
208 learning consists of pre-training a model to detect specific features tailored to the type of data to  
209 process on a large dataset with similar characteristics. For instance, a user who wants to detect objects  
210 in pictures but has a limited annotated set can first pre-train his model on a large public image dataset,  
211 even if the images are unrelated to the objects to detect (Box 2). The model can learn to detect features  
212 like edges or colours<sup>64</sup>, and can be then trained on the smaller dataset containing the objects to  
213 recognize. To save time, it is even possible to directly download the results of pre-training on large  
214 public image datasets for some popular implementations of CNN<sup>64</sup>. Another way to help feed the model  
215 with enough data is data augmentation. Data augmentation consists in the artificial generation of more  
216 data for training from annotated samples. For instance, with sound recordings, noise can be added or  
217 the sound distorted. With images, colours can be altered or the images flipped or rotated. This allows  
218 not only a greater variety of data to be fed to the model but also a sufficient quantity to be provided for  
219 efficient training. Deep learning can even be used to generate realistic datasets for training. This  
220 method has been applied to successfully generate plant images<sup>65,66</sup> or bee markers<sup>67</sup>.  
221 Training on very large datasets also comes with another requirement: computing power. To effectively  
222 train a deep learning algorithm, it will need to learn millions of parameters<sup>68</sup>. To achieve that, very  
223 powerful hardware resources are needed. In fact, the recent explosion in deep learning has been made  
224 possible to the technological advancement in computer hardware and especially the use of graphics  
225 processing units (GPU) found in graphic cards<sup>69</sup> (Box2). The good news is that training a deep learning

226 algorithm can technically be done on any recent hardware, allowing any ecologists with a reasonably  
227 powerful laptop to do it. However good graphics cards can speed up the training time by orders of  
228 magnitude<sup>69</sup>. Even then, training the model can take several days to converge for very complex  
229 analyses and fine tuning the model for improved accuracy could require several training sessions<sup>25,68</sup>.  
230 Nevertheless, once the training is done, the model created is generally quite performing and capable of  
231 going through large datasets efficiently compared to other alternative approaches, thus leading to time  
232 savings<sup>25</sup>.

233 Another common problem with deep learning is that it has limited potential for solving a task it was not  
234 designed and trained for<sup>62</sup>. For instance, if we design an acoustic recognizer to identify a particular  
235 species from its calls, it will have a hard time recognizing taxonomically distant species calls. At the  
236 moment, the easiest way to solve this would be to increase the training dataset size to include samples  
237 of other species of interest, signalling the need for linking deep learning and more traditional analysis  
238 approaches.

### 239 **Concluding remarks**

240 Deep learning, just like other machine learning algorithms, provide useful methods to analyze  
241 nonlinear data with complex interactions and can therefore be useful for ecological studies. But where  
242 deep learning algorithms really shine lies in their ability to automatically detect by themselves objects  
243 of interest in data – such as animals in pictures – just by knowing whether the object is present or not.  
244 Moreover, they can do that with great accuracy, making them choice tools for identification and  
245 classification tasks. While the emphasis has been on so far supervised methods due to their  
246 performance and ease of training, future developments in unsupervised learning are expected, thus  
247 potentially removing the need for annotated datasets altogether<sup>15</sup>.

248 Deep learning shows a lot of promise for ecologists. While the popularity of the method is still very  
249 recent, implementations are already covering a wide array of ecological questions and can prove very  
250 useful tools for managers, conservationists or decision makers by providing a fast, objective and  
251 reliable way to analyze huge amounts of monitoring data. Applications can also go beyond ecology and  
252 deep learning could also be valuable to evolutionists or biologists in general. However, developing a  
253 deep learning solution is not a trivial task yet and ecologists do need to take time to evaluate whether  
254 this is the right tool for the job. Requirements in terms of training datasets, training time, development  
255 complexity and computing power are all aspects that should be considered before going down the deep  
256 learning path.

257 As ecology enters the realm of big data, relying on artificial intelligence to analyze data will become  
258 more and more common. Ecologists will then have to acquire or have access to good programming  
259 and/or mathematical skills. While this might seem scary at first sight, we believe that there is one  
260 simple solution to this challenge: collaboration across disciplines. A stronger interaction between  
261 computer scientists and ecologists could unravel new synergies and approaches in data classification  
262 and analyses, deepening our understanding of fundamental and applied research in ecology. This in turn  
263 would allow ecologists to focus on the ecological questions rather than on the technical aspects of data  
264 analysis and computer scientists to delineate new avenues on some of the most complex data and units  
265 of our biological world such as ecosystems. We also strongly encourage sharing datasets and codes  
266 whenever possible to make ecological research faster, easier and directly replicable in the future,  
267 especially when using complex tools such as deep learning. With software getting more powerful and  
268 easier to use, experience being accumulated and shared and resources such as datasets made available  
269 to everyone, we believe that deep learning could become an accessible and powerful reference tool for  
270 ecologists.

271

272 **Acknowledgements**

273 The figures were made using the IAN/UMCES symbol and image libraries, courtesy of the Integration  
274 and Application Network, University of Maryland Center for Environmental Science  
275 ([ian.umces.edu/symbols/](http://ian.umces.edu/symbols/)).

276 **Author contributions**

277 S.C. and N.L. had the original idea for the study and designed the research. S.C., N.L., and E. H.  
278 collected the review information and carried out the analyses. S.C., N.L. wrote the first drafts of the  
279 manuscript with input from E.H. All authors discussed the results, implications, and edited the  
280 manuscript.

1. Krizhevsky, A., Sutskever, I. & Hinton, G. E. ImageNet classification with deep convolutional neural networks. In *Advances in Neural Information Processing Systems 25* (eds. Pereira, F., Burges, C. J. C., Bottou, L. & Weinberger, K. Q.) 1097–1105 (Curran Associates, Inc., 2012).
2. Hinton, G. *et al.* Deep neural networks for acoustic modeling in speech recognition: the shared views of four research groups. *IEEE Signal Process. Mag.* **29**, 82–97 (2012).
3. Olden, J. D., Lawler, J. J. & Poff, N. L. Machine learning methods without tears: A primer for ecologists. *Q. Rev. Biol.* **83**, 171–193 (2008).
4. Shen, D., Wu, G. & Suk, H.-I. Deep Learning in Medical Image Analysis. *Annu. Rev. Biomed. Eng.* **19**, 221–248 (2017).
5. Golden, J. A. Deep learning algorithms for detection of lymph node metastases from breast cancer: Helping artificial intelligence be seen. *JAMA* **318**, 2184–2186 (2017).
6. Min, S., Lee, B. & Yoon, S. Deep learning in bioinformatics. *Brief. Bioinform.* **18**, 851–869 (2017).
7. Heaton J. B., Polson N. G. & Witte J. H. Deep learning for finance: deep portfolios. *Appl. Stoch. Models Bus. Ind.* **33**, 3–12 (2016).
8. Bojarski, M. *et al.* Explaining how a deep neural network trained with end-to-end learning steers a car. Preprint at <http://arxiv.org/abs/1704.07911> (2017).
9. Lenz, I., Lee, H. & Saxena, A. Deep learning for detecting robotic grasps. Preprint at <http://arxiv.org/abs/1301.3592> (2013).
10. Lample, G. & Chaplot, D. S. Playing FPS Games with Deep Reinforcement Learning. In *Thirty-First AAAI Conference on Artificial Intelligence* (2017).
11. Thessen, A. Adoption of machine learning techniques in ecology and earth science. *One Ecosyst.* **1**, e8621 (2016).
12. Acevedo, M. A., Corrada-Bravo, C. J., Corrada-Bravo, H., Villanueva-Rivera, L. J. & Aide, T. M. Automated classification of bird and amphibian calls using machine learning: A comparison of methods. *Ecol. Inform.* **4**, 206–214 (2009).
13. Recknagel, F. Applications of machine learning to ecological modelling. *Ecol. Model.* **146**, 303–310 (2001).

14. Valletta. Applications of machine learning in animal behaviour studies. *Anim. Behav.* **124**, 203–220 (2017).
15. LeCun, Y., Bengio, Y. & Hinton, G. Deep learning. *Nature* **521**, 436–444 (2015).
16. Rovero, F., Zimmermann, F., Berzi, D. & Meek, P. ‘Which camera trap type and how many do I need?’ A review of camera features and study designs for a range of wildlife research applications. *Hystrix Ital. J. Mammal.* **24**, 148–156 (2013).
17. Stowell, D., Wood, M., Stylianou, Y. & Glotin, H. Bird detection in audio: a survey and a challenge. *ArXiv160803417 Cs* (2016).
18. Namin, S. T., Esmailzadeh, M., Najafi, M., Brown, T. B. & Borevitz, J. O. Deep phenotyping: Deep learning for temporal phenotype/genotype classification. Preprint at <https://www.biorxiv.org/content/early/2017/05/04/134205> (2017).
19. Weinstein, B. G. A computer vision for animal ecology. *J. Anim. Ecol.* **87**, 533–545 (2017).
20. Norouzzadeh, M. S. *et al.* Automatically identifying, counting, and describing wild animals in camera-trap images with deep learning. Preprint at <http://arxiv.org/abs/1703.05830> (2017).
21. Joly, A. *et al.* LifeCLEF 2017 lab overview: Multimedia species identification challenges. In *Experimental IR Meets Multilinguality, Multimodality, and Interaction* (eds. Jones, G. J. F. *et al.*) **10456**, 255–274 (Springer International Publishing, 2017).
22. Barre, P., Stoeber, B. C., Mueller, K. F. & Steinhage, V. LeafNet: A computer vision system for automatic plant species identification. *Ecol. Inform.* **40**, 50–56 (2017).
23. Rzanny, M., Seeland, M., Wäldchen, J. & Mäder, P. Acquiring and preprocessing leaf images for automated plant identification: understanding the tradeoff between effort and information gain. *Plant Methods* **13**, 97 (2017).
24. Younis, S. *et al.* Taxon and trait recognition from digitized herbarium specimens using deep convolutional neural networks. *Bot. Lett.* 1–7 (2018).
25. Knight, E. *et al.* Recommendations for acoustic recognizer performance assessment with application to five common automated signal recognition programs. *Avian Conserv. Ecol.* **12**, (2017).

26. Potamitis, I. Deep learning for detection of bird vocalisations. Preprint at <http://arxiv.org/abs/1609.08408> (2016).
27. Potamitis, I. Unsupervised dictionary extraction of bird vocalisations and new tools on assessing and visualising bird activity. *Ecol. Inform.* **26, Part 3**, 6–17 (2015).
28. Dugan, P. J., Clark, C. W., LeCun, Y. A. & Van Parijs, S. M. Phase 2: DCL system using deep learning approaches for land-based or ship-based real-time recognition and localization of marine mammals - machine learning detection algorithms. Preprint at <http://arxiv.org/abs/1605.00972> (2016).
29. Kiskin, I. *et al.* Mosquito detection with neural networks: The buzz of deep learning. Preprint at <http://arxiv.org/abs/1705.05180> (2017).
30. Dobrescu, A., Giuffrida, M. V. & Tsaftaris, S. A. Leveraging multiple datasets for deep leaf counting. Preprint at <https://www.biorxiv.org/content/early/2017/09/06/185173> (2017).
31. Douarre, C., Schielein, R., Frindel, C., Gerth, S. & Rousseau, D. Deep learning based root-soil segmentation from X-ray tomography. Preprint at <https://www.biorxiv.org/content/early/2016/08/25/071662> (2016).
32. Pound, M. P., Atkinson, J. A., Wells, D. M., Pridmore, T. P. & French, A. P. Deep learning for multi-task plant phenotyping. Preprint at <https://www.biorxiv.org/content/early/2017/10/17/204552> (2017).
33. Turesson, H. K., Conceicao, T. B. R. & Ribeiro, S. Head and gaze tracking of unrestrained marmosets. 079566 (2016).
34. Brown, A. E. & Bivort, B. de. Ethology as a physical science. Preprint at <https://www.biorxiv.org/content/early/2018/02/02/220855> (2018).
35. Wild, B., Sixt, L. & Landgraf, T. Automatic localization and decoding of honeybee markers using deep convolutional neural networks. Preprint at <http://arxiv.org/abs/1802.04557> (2018).
36. Browning, E. *et al.* Predicting animal behaviour using deep learning: GPS data alone accurately predict diving in seabirds. *Methods Ecol. Evol.* **9**, 681–692 (2017).



37. Li, K., Javer, A., Keaveny, E. E. & Brown, A. E. X. Recurrent neural networks with interpretable cells predict and classify worm behaviour. Preprint at <https://www.biorxiv.org/content/early/2017/11/20/222208> (2017).
38. Wachtmeister, C.-A. & Enquist, M. The evolution of courtship rituals in monogamous species. *Behav. Ecol.* **11**, 405–410 (2000).
39. Ryan, M. & Getz, W. Signal decoding and receiver evolution - An analysis using an artificial neural network. *Brain. Behav. Evol.* **56**, 45–62 (2000).
40. Marques, T. A. *et al.* Estimating animal population density using passive acoustics. *Biol. Rev.* **88**, 287–309 (2013).
41. Cruz, A. C., Luvisi, A., De Bellis, L. & Ampatzidis, Y. X-FIDO: An effective application for detecting Olive Quick Decline Syndrome with deep learning and data fusion. *Front. Plant Sci.* **8**, (2017).
42. Ramcharan, A. *et al.* Deep learning for image-based cassava disease detection. *Front. Plant Sci.* **8**, (2017).
43. Mohanty, S. P., Hughes, D. P. & Salathé, M. Using deep learning for image-based plant disease detection. *Front. Plant Sci.* **7**, (2016).
44. Borchard, P., Eldridge, D. J. & Wright, I. A. *Sarcoptes mange (Sarcoptes scabiei)* increases diurnal activity of bare-nosed wombats (*Vombatus ursinus*) in an agricultural riparian environment. *Mamm. Biol. - Z. Für Säugetierkd.* **77**, 244–248 (2012).
45. Chen, D., Xue, Y., Chen, S., Fink, D. & Gomes, C. Deep multi-species embedding. Preprint at <http://arxiv.org/abs/1609.09353> (2016).
46. Desjardins-Proulx, P., Laigle, I., Poisot, T. & Gravel, D. Ecological Interactions and the Netflix Problem. *bioRxiv* 089771 (2017).
47. Song, Q., Zhao, M.-R., Zhou, X.-H., Xue, Y. & Zheng, Y.-J. Predicting gastrointestinal infection morbidity based on environmental pollutants: Deep learning versus traditional models. *Ecol. Indic.* **82**, 76–81 (2017).

48. Song, Q., Zheng, Y.-J., Xue, Y., Sheng, W.-G. & Zhao, M.-R. An evolutionary deep neural network for predicting morbidity of gastrointestinal infections by food contamination. *Neurocomputing* **226**, 16–22 (2017).
49. Malek, S., Salleh, A., Milow, P., Baba, M. S. & Sharifah, S. A. Applying artificial neural network theory to exploring diatom abundance at tropical Putrajaya Lake, Malaysia. *J. Freshw. Ecol.* **27**, 211–227 (2012).
50. Jeong, K.-S., Kim, D.-K., Jung, J.-M., Kim, M.-C. & Joo, G.-J. Non-linear autoregressive modelling by Temporal Recurrent Neural Networks for the prediction of freshwater phytoplankton dynamics. *Ecol. Model.* **211**, 292–300 (2008).
51. Jeong, K., Joo, G., Kim, H., Ha, K. & Recknagel, F. Prediction and elucidation of phytoplankton dynamics in the Nakdong River (Korea) by means of a recurrent artificial neural network. *Ecol. Model.* **146**, 115–129 (2001).
52. Chon, T., Kwak, I., Park, Y., Kim, T. & Kim, Y. Patterning and short-term predictions of benthic macroinvertebrate community dynamics by using a recurrent artificial neural network. *Ecol. Model.* **146**, 181–193 (2001).
53. Ellis, E. C. Ecology in an anthropogenic biosphere. *Ecol. Monogr.* **85**, 287–331 (2015).
54. Salamon, J., Bello, J. P., Farnsworth, A. & Kelling, S. Fusing shallow and deep learning for bioacoustic bird species classification. In *2017 IEEE International Conference on Acoustics, Speech and Signal Processing (ICASSP)* 141–145 (2017).
55. Aodha, O. M. *et al.* Bat detective - Deep learning tools for bat acoustic signal detection. *PLOS Comput. Biol.* **14**, e1005995 (2018).
56. Beijbom, O. *et al.* Quantification in-the-wild: data-sets and baselines. Preprint at <http://arxiv.org/abs/1510.04811> (2015).
57. Xu, R. *et al.* Aerial images and convolutional neural network for cotton bloom detection. *Front. Plant Sci.* **8**, (2018).
58. Asner, G. P. *et al.* Mapped aboveground carbon stocks to advance forest conservation and recovery in Malaysian Borneo. *Biol. Conserv.* **217**, 289–310 (2018).

59. Kroodsma, D. A. *et al.* Tracking the global footprint of fisheries. *Science* **359**, 904–908 (2018).
60. Di Minin, E., Fink, C., Tenkanen, H. & Hiippala, T. Machine learning for tracking illegal wildlife trade on social media. *Nat. Ecol. Evol.* **2**, 406–407 (2018).
61. Cantrell, B., Martin, L. J. & Ellis, E. C. Designing autonomy: Opportunities for new wildness in the Anthropocene. *Trends Ecol. Evol.* **32**, 156–166 (2017).
62. Marcus, G. Deep learning: A critical appraisal. Preprint at <http://arxiv.org/abs/1801.00631> (2018).
63. Aide, T. M. *et al.* Real-time bioacoustics monitoring and automated species identification. *PeerJ* **1**, e103 (2013).
64. Schneider, S., Taylor, G. W. & Kremer, S. C. Deep learning object detection methods for ecological camera trap data. Preprint at <http://arxiv.org/abs/1803.10842> (2018).
65. Giuffrida, M. V., Scharr, H. & Tsaftaris, S. A. ARIGAN: Synthetic Arabidopsis Plants using Generative Adversarial Network. Preprint at <https://www.biorxiv.org/content/early/2017/09/04/184259> (2017).
66. Barth, R., IJsselmuiden, J., Hemming, J. & Van Henten, E. J. Synthetic bootstrapping of convolutional neural networks for semantic plant part segmentation. *Comput. Electron. Agric.* (2017).
67. Sixt, L., Wild, B. & Landgraf, T. RenderGAN: Generating realistic labeled data. Preprint at <http://arxiv.org/abs/1611.01331> (2016).
68. Chollet, F. Xception: Deep learning with depthwise separable convolutions. Preprint at <http://arxiv.org/abs/1610.02357> (2016).
69. Schmidhuber, J. Deep learning in neural networks: An overview. *Neural Netw.* **61**, 85–117 (2015).
70. Fernández, S., Graves, A. & Schmidhuber, J. An application of recurrent neural networks to discriminative keyword spotting. In *Proceedings of the 17th International Conference on Artificial Neural Networks* 220–229 (Springer-Verlag, 2007).
71. Sutskever, I., Vinyals, O. & Le, Q. V. Sequence to sequence learning with neural networks. Preprint at <http://arxiv.org/abs/1409.3215> (2014).

72. Swanson, A. *et al.* Snapshot Serengeti, high-frequency annotated camera trap images of 40 mammalian species in an African savanna. *Sci. Data* **2**, 150026 (2015).
73. Candela, L., Castelli, D., Manghi, P. & Tani, A. Data journals: A survey. *J. Assoc. Inf. Sci. Technol.* **66**, 1747–1762 (2015).

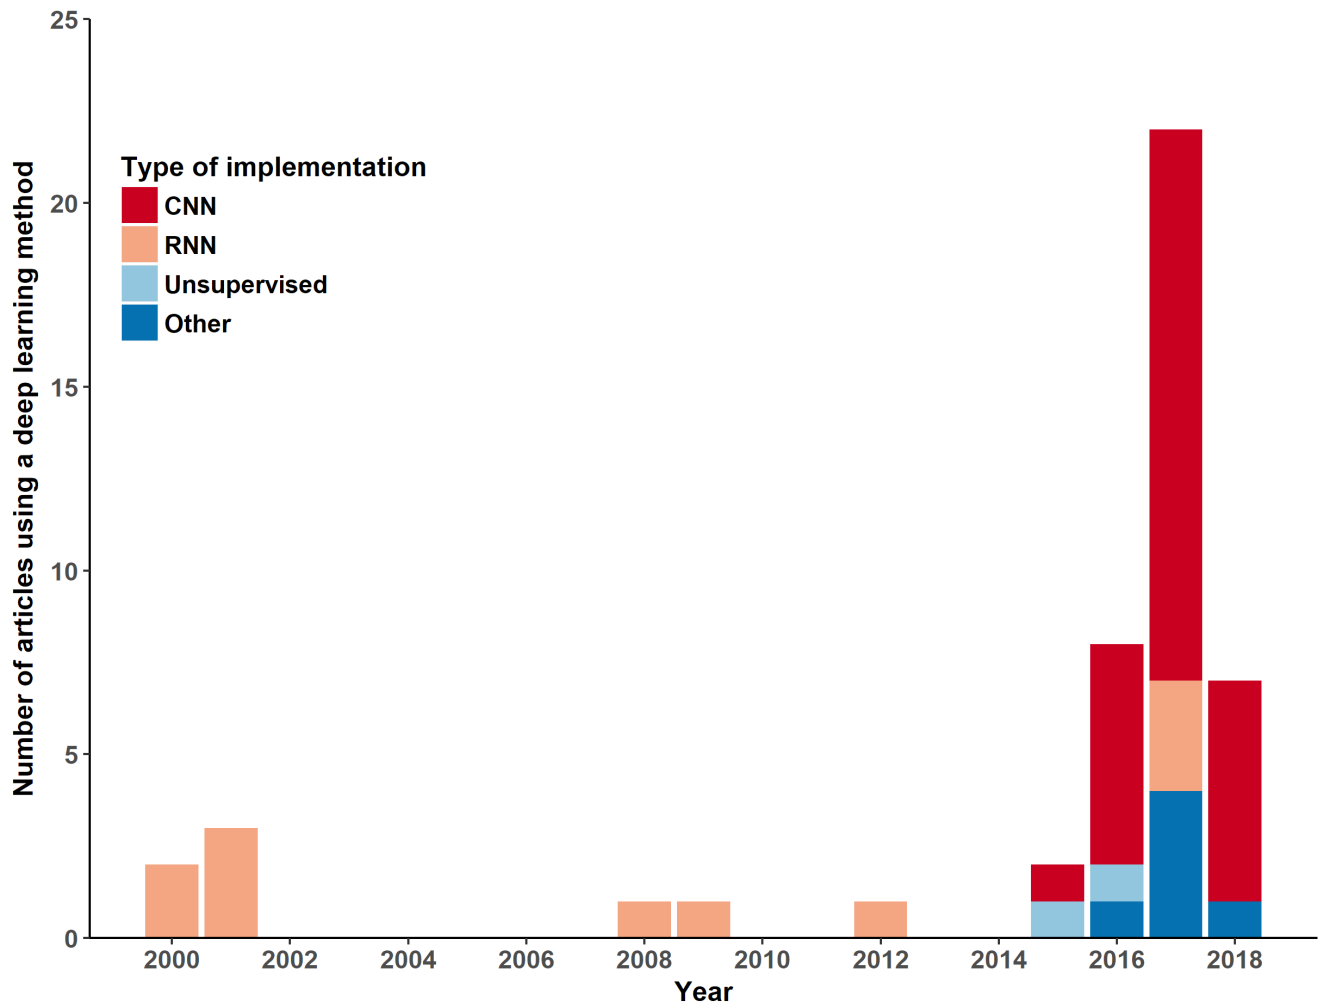

**Figure 1: Repartition of deep learning implementations in ecology by year and architecture.**

Implementations were grouped in 4 categories: convolutional neural networks (CNN), recurrent neural networks (RNN), and unsupervised methods. The "Other" category includes studies where classification of the type of algorithm was either difficult to identify or undisclosed. Note that one study<sup>18</sup> was counted twice as it implemented a combination of CNN and RNN.

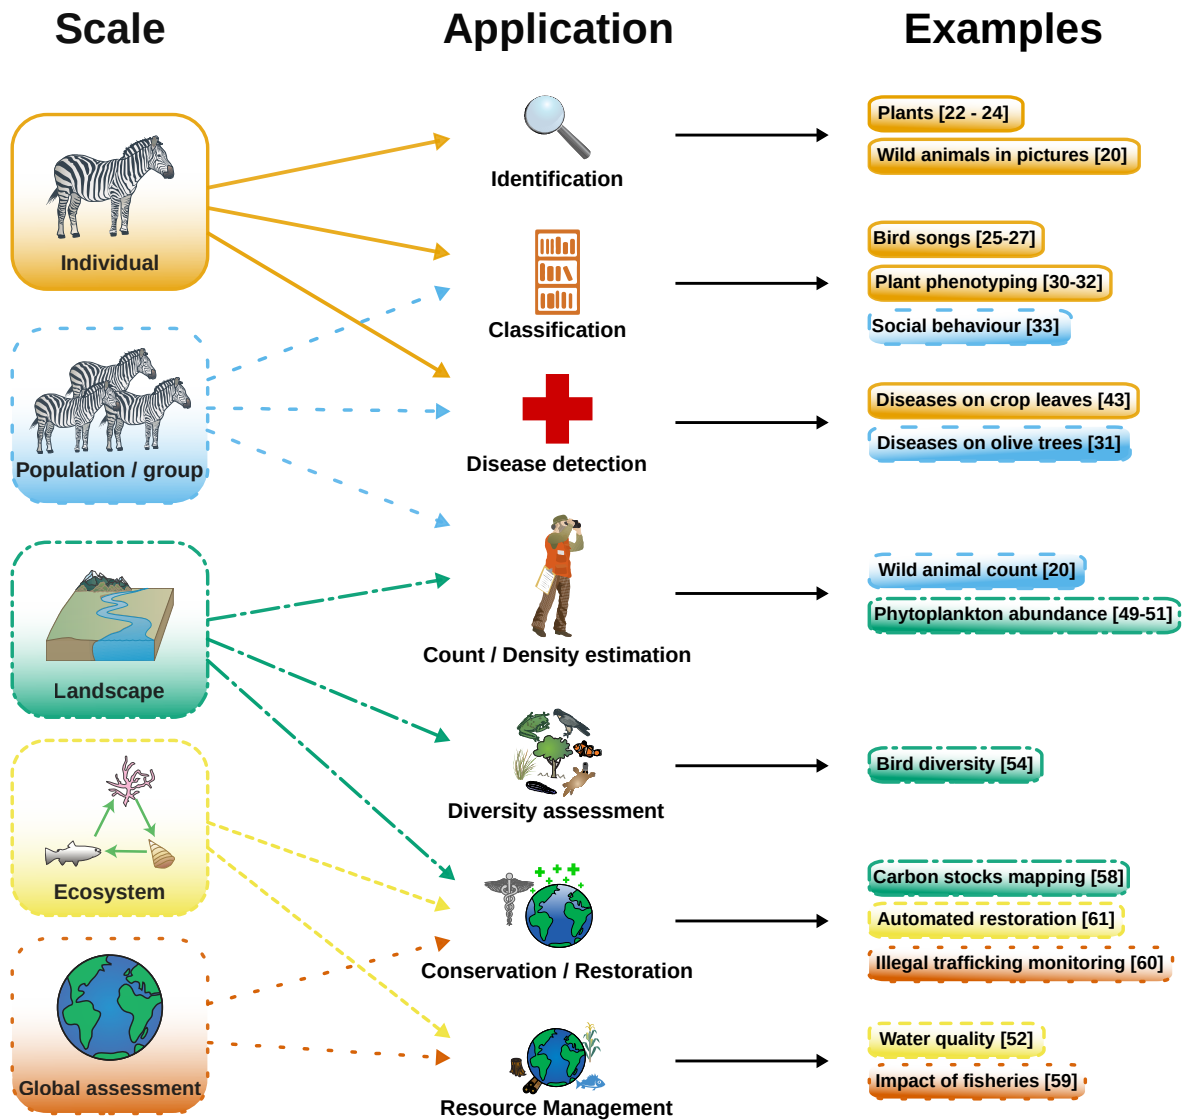

Figure 2: Examples of deep learning applications in ecology depending on the study scale

## 283 **Box 1: Deep neural networks architectures**

284 From a technical standpoint, deep learning algorithms are multilayered neural networks. Neural  
285 networks are models that process information in a way inspired by biological processes, with highly  
286 interconnected processing units called neurons working together to solve problems<sup>3,11</sup>(Figure I). Neural  
287 networks have three main parts: 1) an input layer that receives the data, 2) an output layer that gives the  
288 result of the model, and 3) the processing core that contains one or more hidden layers. What  
289 differentiates a conventional neural network from a deep one is the number of hidden layers, which  
290 represents the depth of the network. Unfortunately, there is no consensus on how many hidden layers  
291 are required to differentiate a shallow from a deep neural network<sup>69</sup>.

292 During training, the network adjusts its behaviour in order to obtain the desired output. This is done by  
293 computing an error function by comparing the output of the model to the correct answer. The network  
294 then tries to minimize it by adjusting internal parameters of the function called weights, generally by  
295 using a process called gradient descent<sup>15</sup>.

296 Among deep networks, several structures can be found. Feedforward networks map an input of  
297 determined size (e.g. an image) to an output of a given size (e.g. a classification probability) by going  
298 through a fixed number of layers<sup>15</sup>. One of the feedforward implementation that received the most  
299 attention due to its ease of training and good generalization is the convolutional neural network (CNN).  
300 CNNs are designed to process multiple arrays of data such as colour images and generally consist of  
301 stacking groups of convolutional layers and pooling layers in a way inspired by biological visual  
302 systems<sup>15</sup>.

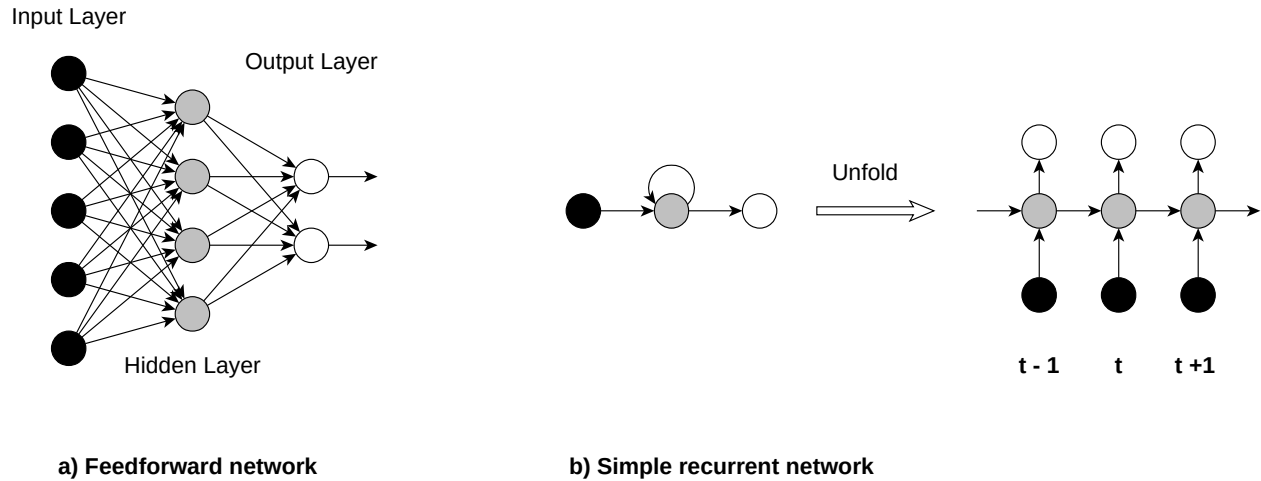

**Figure I: Architecture of common neural networks.** a) Feedforward networks are unidirectional, from the input layer to the output layer and through hidden layers. Deep feedforward networks have usually at least three hidden layers. b) Simple recurrent neural networks get input from previous time steps and can be unfolded to feedforward networks

303 Recurrent neural networks (RNN) usually have only one hidden layer but they process elements in  
304 sequence, one at a time and keep a memory of previous elements, with each output included in the  
305 input of the next element<sup>15</sup>. The summation of each individual step can thus be seen as one very deep  
306 feedforward network. This makes them particularly interesting for sequential input such as speech or  
307 time series <sup>15</sup>. A popular implementation of RNN is the Long Term Short-Memory network (LSTM), an  
308 architecture capable of learning long-term dependencies that has proven especially efficient for tasks  
309 such as speech recognition<sup>70</sup> or translation<sup>71</sup>.



## 310 **Box 2: Deep learning toolkit**

311 Here we provide some resources that might be useful in order to successfully create and deploy a deep  
312 learning tool.

### 313 Libraries and packages:

314 With the rapid development of deep learning, a great number of libraries and packages have been  
315 created to set a deep network with minimal effort. Most of the popular tools are open source and  
316 packages are available in multiple programming languages such as Python, R, Java, Javascript,  
317 MATLAB or C++. Note, however, that Python seems to be the most popular programming language for  
318 deep learning at the moment (Table I). Keep in mind that most of these tools are currently in active  
319 development and could therefore evolve rapidly.

**Table I: List of deep learning frameworks and their language**

| Framework                       | Language                                           | URL                                                                                                                         |
|---------------------------------|----------------------------------------------------|-----------------------------------------------------------------------------------------------------------------------------|
| Tensorflow                      | Python, C/C++, R, Java, Go, Julia                  | <a href="https://www.tensorflow.org/">https://www.tensorflow.org/</a>                                                       |
| Caffe                           | Python                                             | <a href="http://caffe.berkeleyvision.org/">http://caffe.berkeleyvision.org/</a>                                             |
| PyTorch                         | Python                                             | <a href="https://pytorch.org/">https://pytorch.org/</a>                                                                     |
| Deeplearning4J                  | Java, Scala                                        | <a href="https://deeplearning4j.org/">https://deeplearning4j.org/</a>                                                       |
| Keras                           | Python, R                                          | <a href="https://keras.io/">https://keras.io/</a>                                                                           |
| MATLAB + Neural Network Toolbox | MATLAB                                             | <a href="https://www.mathworks.com/products/neural-network.html">https://www.mathworks.com/products/neural-network.html</a> |
| Apache MXNET                    | C++,Python,Julia,Matlab,JavaScript,Go,R,Scala,Perl | <a href="http://mxnet.incubator.apache.org/">http://mxnet.incubator.apache.org/</a>                                         |
| PlaidML                         | Python                                             | <a href="https://github.com/plaidml/plaidml">https://github.com/plaidml/plaidml</a>                                         |

## 320 Graphic cards

321 While optional, deep learning benefits a lot from the use of graphics processing units (GPU) to speed  
322 up training. However, at the moment of writing, the market of deep learning is mostly dominated by the  
323 manufacturer nVidia, who offers cards specially designed for deep learning applications. Therefore,  
324 while some deep learning framework – such as plaidML – support all graphics card, most frameworks

325 only offer GPU acceleration for graphics cards created by nVidia. Fortunately for researchers, a grant  
326 program exists to offer free graphics cards to promote research with deep learning.

327 Other useful resources

328 **Github.com:** a website originally designed as a tool to freely share and keep track of change in  
329 programming code. By promoting open source collaboration, github provides not only a great way to  
330 save your code but also a reference database in which examples and tools can be found.

331 **Kaggle.com:** A data science website that allows you to host competitions to get the best machine  
332 learning models suited to your data. By providing training and reference datasets, the expected results  
333 and offering a reward, data scientists can create for your deep learning models without you having to  
334 learn how to do it. It also provides a useful source of information, examples, reference databases as  
335 well as access to an experienced community for those who want to learn more about deep learning by  
336 themselves

337 Reference databases:

338 Public annotated databases can increasingly be found online in order to facilitate the training of deep  
339 neural networks in ecology. Some of them include bird sounds such as the Macaulay  
340 (<https://www.macaulaylibrary.org/>) or Xeno-Canto (<https://www.xeno-canto.org/>) libraries, bat calls<sup>55</sup>,  
341 plants<sup>65</sup>, or animal images<sup>72</sup>. More generalist reference databases are also available to pre-train neural  
342 networks such as MNIST (<http://yann.lecun.com/exdb/mnist/>) or ImageNet (<http://image-net.org/>).

343 As scientists are increasingly required to render their research data available, training datasets will  
344 become easier to come by in the near future; and the recent surge in data repositories facilitate data-  
345 hungry analyses. Some journals such as Scientific Data even focus solely on the publication of research  
346 datasets<sup>73</sup>.
